# Supplementary material for: Perioperative Beta-Blocker Therapy and Mortality after Major Noncardiac Surgery
Source: Atypon-hosted journal article supplement (doi:10.1056/nejmoa041895), 2005-07-27

## Supplementary Appendix

This appendix has been provided by the authors to give readers additional information about their work.

Supplement to: Lindenauer PK, Pekow P, Wang K, Mamdi DK, Gutierrez B, Benjamin EM. Perioperative beta-blocker therapy and mortality after major noncardiac surgery. *N Engl J Med* 2005;353:349-61.

Supplemental Table. In-Hospital Mortality and Numbers Needed to Treat [Harm] Among Patients in the Complete Study Cohort Who Did Not Receive Perioperative Beta Blockade by Revised Cardiac Risk Index (RCRI), including insulin use in identifying diabetes

| RCRI |                      | Mortality<br>Among<br>Untreated % | OR (95% CI)       | NNT [NNH] (95% CI)   |
|------|----------------------|-----------------------------------|-------------------|----------------------|
| 0    | All patients         | 0.96                              | 1.46 (1.36, 1.57) | [230] ([297], [185]) |
|      | HTN                  | 0.88                              | 0.93 (0.77, 1.13) | 1628 (488, [899])    |
|      |                      |                                   |                   |                      |
| 1    | All patients         | 2.18                              | 1.18 (1.08, 1.29) | [263] ([597], [163]) |
|      | DM                   | 3.85                              | 1.24 (1.12, 1.37) | [114] ([234], [73])  |
|      | IHD                  | 1.56                              | 1.16 (0.97, 1.39) | [406] (2035, [167])  |
|      | CVD                  | 6.74                              | 1.05 (0.79, 1.39) | [326] (75, [42])     |
|      | CRI                  | 4.96                              | 1.01 (0.72, 1.42) | [2651] (74, [52])    |
|      | High Risk<br>Surgery | 1.40                              | 1.01 (0.88, 1.15) | [14517] (594, [485]) |
|      |                      |                                   |                   |                      |
| 2    | All patients         | 5.17                              | 0.95 (0.85, 1.06) | 422 (136, [319])     |
|      |                      |                                   |                   |                      |
| 3    | All patients         | 7.22                              | 0.77 (0.67, 0.88) | 63 (44, 125)         |
|      |                      |                                   |                   |                      |
| 4    | All patients         | 10.41                             | 0.62 (0.52, 0.73) | 27 (21, 39)          |

Supplemental Figure. Adjusted OR (95 percent CI) of In-Hospital Mortality Associated with Perioperative Beta Blocker Therapy Among Patients Undergoing Major Noncardiac Surgery Stratified by Revised Cardiac Index (RCRI) Score in the Entire Study Cohort

Legend

HTN (Hypertension), DM\* (Diabetes Mellitus), IHD (ischemic Heart Disease), CRI (Chronic Renal Insufficiency), CVD (Cerebrovascular Disease)

\*Including insulin use in identifying diabetes

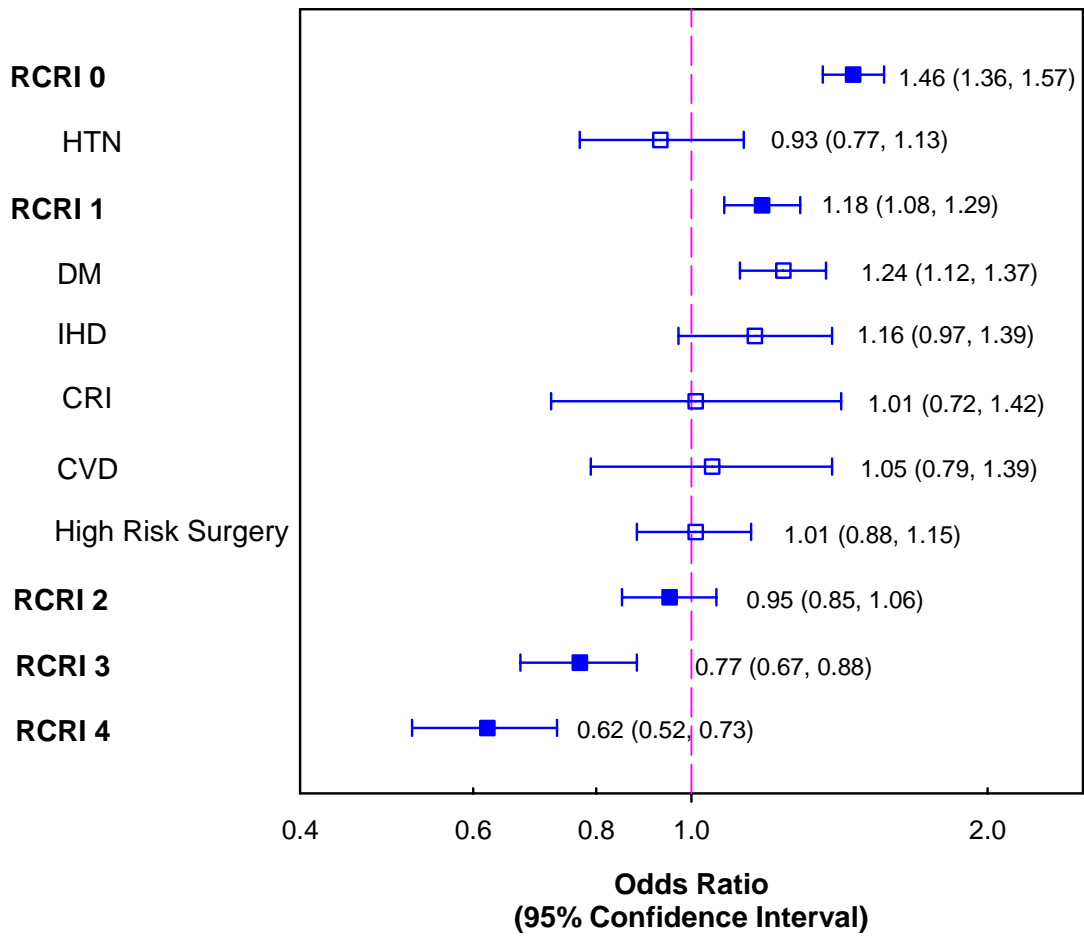

Supplement: nejm_lindenauer_349sa1.pdf [file nejm_lindenauer_349sa1.pdf]
